# Supplementary material for: A Monoclonal Antibody-Based Immunochromatographic Test Strip and Its Application in the Rapid Detection of Cucumber Green Mottle Mosaic Virus
Source: Biosensors (Basel). 2023 Jan 29;13(2):199. doi: 10.3390/bios13020199 (PMC9953337; doi:10.3390/bios13020199)
Supplement: Supplementary file 1 [file biosensors-13-00199-s001.zip › biosensors-2098629-supplementary.pdf]

---

*Supplementary Material*

# **A Monoclonal Antibody-Based Immunochromatographic Test Strip and Its Application in the Rapid Detection of Cucumber Green Mottle Mosaic Virus**

Zichen Zhao <sup>1</sup>, Yanli Tian <sup>1</sup>, Chang Xu <sup>1</sup>, Yuanfei Xing <sup>1</sup>, Lili Yang <sup>1</sup>, Guoliang Qian <sup>1</sup>, Xiude Hua <sup>2</sup>, Weirong Gong <sup>3</sup>, Baishi Hu <sup>1</sup> and Limin Wang <sup>1,\*</sup>

\*Corresponding author: E-mail address: wlm@njau.edu.cn

---

**Table S1.** Effect of different types of nitrocellulose membranes on test strips

| Material                   | Type name | Buffer solution | Healthy leaves | Diseased leaves |
|----------------------------|-----------|-----------------|----------------|-----------------|
| nitrocellulose<br>membrane | CN-95     | -               | -              | ++              |
|                            | FF-120    | +               | +              | ++++            |
|                            | Paul-120  | -               | -              | +++             |
|                            | CN-140    | -               | -              | ++              |
|                            | Paul-170  | -               | -              | +               |

“+” represents the color depth of the test strip detection line; ++++ indicates the darkest color of the detection line; +++ is darker than ++; ++ is darker than +; - represents that the detection line has no color.

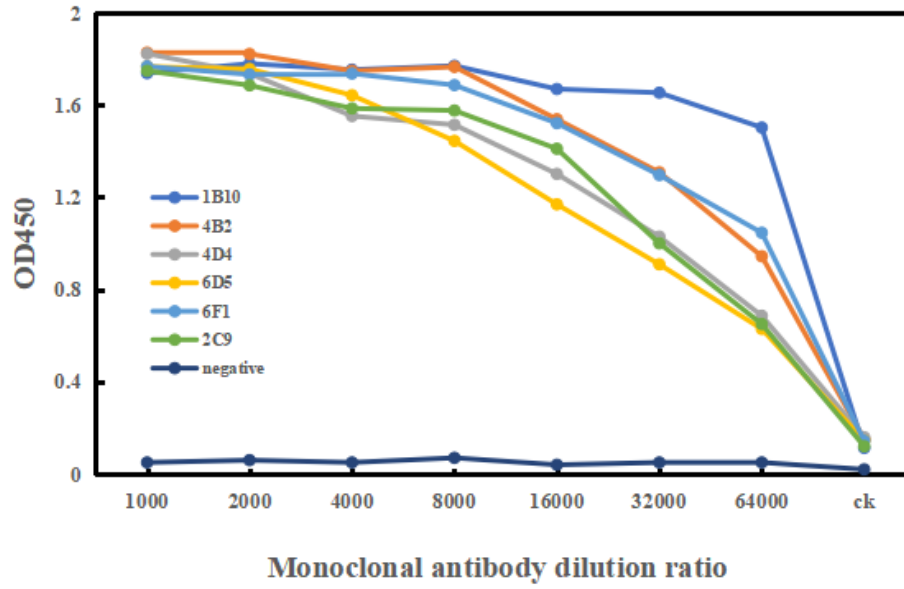

**Figure S1.** Determination of titer of mAbs by indirect ELISA. (negative is incubated with the same amount of healthy leaf grinding solution, and the results are determined by ELISA).
